# Supplementary material for: Lanthanide(iii) SMMs with cationic and anionic complex fragments formed by a Schiff base: structure, luminescence, magnetic properties and ab initio calculations
Source: Royal Society of Chemistry journal article supplement (doi:10.1039/d4dt01284d), 2024-01-01
Supplement: d4dt01284d1.pdf [file d4dt01284d1.pdf]

## Electronic Supplementary Information

### Lanthanides SMM with cationic and anionic complex fragments formed by the Schiff base: structure, luminescence, magnetic properties and ab initio calculations

Alexey Gusev, Ivan Nemeč, Radovan Herchel, Yuriy Baluda, Konstantin Babeshkin, Nikolay Efimov, Mikhail Kiskin, Wolfgang Linert

#### Contents

|                    |                                                                                                                                                                                                                                                     |
|--------------------|-----------------------------------------------------------------------------------------------------------------------------------------------------------------------------------------------------------------------------------------------------|
| <b>Table S1</b>    | Crystal data and structure refinement summary for complexes 1-3                                                                                                                                                                                     |
| <b>Table S2</b>    | Selected bond length for complexes 1-3.                                                                                                                                                                                                             |
| <b>Figure S1</b>   | IR spectra of complex 1                                                                                                                                                                                                                             |
| <b>Figure S2</b>   | IR spectra of complex 2                                                                                                                                                                                                                             |
| <b>Figure S3</b>   | IR spectra of complex 3                                                                                                                                                                                                                             |
| <b>Figure S4.</b>  | ESI-MS spectra of complexes 2 and 3.                                                                                                                                                                                                                |
| <b>Figure S5.</b>  | TG curves of complexes 1-3                                                                                                                                                                                                                          |
| <b>Figure S6.</b>  | Temperature dependence of magnetic moment for 1. The red lines represent the best fit of the theoretical model described in the main text.                                                                                                          |
| <b>Figure S7.</b>  | Field dependence of molar magnetization for 1 (a), 2 (b) and 3 (c) at different temperatures                                                                                                                                                        |
| <b>Figure S8.</b>  | Field dependence of the out-of-phase signal vs frequency at 2 K for 3                                                                                                                                                                               |
| <b>Figure S9.</b>  | Field dependence of the out-of-phase signal vs frequency at 10 K for 3                                                                                                                                                                              |
| <b>Figure S10.</b> | Frequency dependence of the out-phase $\chi''$ ac susceptibility signals for 3 under 5000 Oe dc field                                                                                                                                               |
| <b>Figure S11.</b> | Relaxation data at 5000 Oe plotted as $\tau$ vs. $T^{-1}$ for 3. The lines represent the best fits of experimental data to the Arrhenius equation and multiple relaxation processes                                                                 |
| <b>Figure S12.</b> | Relaxation data at 5000 Oe plotted as $\tau$ vs. $T^{-1}$ for 2. The lines represent the best fits of experimental data to the Arrhenius equation and multiple relaxation processes                                                                 |
| <b>Figure S13.</b> | Relaxation data at 2500 Oe plotted as $\tau$ vs. $T^{-1}$ for 1. The solid line represent the best fits of experimental data to the multiple relaxation processes                                                                                   |
| <b>Figure S14.</b> | The comparison of the experimental magnetic data for 2 and 3, and the calculated data from CASSCF/(NEVPT20/SINGLE_ANISO calculations (method A-C).                                                                                                  |
| <b>Figure S15.</b> | The molecular structures of complex cation (top) and anion (bottom) of compound 2 overlaid with principal axis of g-tensor of the first pseudo doublet (x/y/z-axes colored as red/green/blue arrows) resulting from CASSCF/SINGLE_ANISO (method B). |
| <b>Figure S16.</b> | The molecular structures of complex cation and anion of compound 3 overlaid with principal axis of g-tensor of the first Kramers doublet (x/y/z-axes colored as red/green/blue arrows) resulting from CASSCF/SINGLE_ANISO (method B).               |
| <b>Table S3</b>    | The summarization of SMMs on Dy(III) ion and Salen-type ligand basis                                                                                                                                                                                |
| <b>Table S4</b>    | The summarization of SMMs on Dy(III) ion and Schiff base ligand basis with $\Delta E/kB.>200$ K                                                                                                                                                     |
| <b>Table S5</b>    | The splitting of the lowest multiplets for Tb-cationic complex of 2 calculated by CASSCF/SINGLE_ANISO (method B) together with g-values for selected pseudo doublets and respective tunnelling rates                                                |
| <b>Table S6</b>    | The splitting of the lowest multiplets for Tb-anionic complex of 2 calculated by CASSCF/SINGLE_ANISO (method B) together with g-values for selected pseudo doublets and respective tunnelling rates                                                 |
| <b>Table S7</b>    | The splitting of the lowest multiplets for Dy-cationic complex of 3 calculated by CASSCF/SINGLE_ANISO (method B) together with g-values for each Kramers doublets                                                                                   |

|                 |                                                                                                                                                                  |
|-----------------|------------------------------------------------------------------------------------------------------------------------------------------------------------------|
| <b>Table S8</b> | The splitting of the lowest multiplets for Dy-anionic complex of 3 calculated by CASSCF/SINGLE_ANISO (method B) together with g-values for each Kramers doublets |
|-----------------|------------------------------------------------------------------------------------------------------------------------------------------------------------------|

**Table S1.** Crystal data and structure refinement summary for complexes 1-3

|                                                                                             | 1                       | 2                       | 3                       |
|---------------------------------------------------------------------------------------------|-------------------------|-------------------------|-------------------------|
| Crystal data                                                                                |                         |                         |                         |
| Crystal system, space group                                                                 | Monoclinic, <i>P2/n</i> | Monoclinic, <i>P2/n</i> | Monoclinic, <i>P2/n</i> |
| Temperature (K)                                                                             | 150                     | 150                     | 150                     |
| <i>a</i> , (Å)                                                                              | 17.561 (5),             | 17.603 (12),            | 17.539 (2),             |
| <i>b</i> , (Å)                                                                              | 10.410 (3),             | 10.429 (10),            | 10.4381 (10),           |
| <i>c</i> (Å)                                                                                | 24.663 (10)             | 24.755 (14)             | 24.728 (2)              |
| $\beta$ (°)                                                                                 | 106.452 (14)            | 106.180 (16)            | 106.211 (4)             |
| <i>V</i> (Å <sup>3</sup> )                                                                  | 4324 (2)                | 4365 (6)                | 4347.0 (8)              |
| <i>Z</i>                                                                                    | 2                       | 2                       | 2                       |
| Radiation type                                                                              | Mo <i>K</i> $\alpha$    | Mo <i>K</i> $\alpha$    | Mo <i>K</i> $\alpha$    |
| $\mu$ (mm <sup>-1</sup> )                                                                   | 1.60                    | 1.68                    | 1.78                    |
| Crystal size (mm)                                                                           | 0.1 × 0.06 × 0.02       | 0.10 × 0.06 × 0.02      | 0.15 × 0.12 × 0.05      |
| No. of measured, independent and observed [ <i>I</i> > 2 $\sigma$ ( <i>I</i> )] reflections | 41651, 10314, 7515      | 45284, 10824, 7520      | 52297, 13408, 10405     |
| <i>R</i> <sub>int</sub>                                                                     | 0.077                   | 0.093                   | 0.050                   |
| ( <i>sin</i> $\theta$ / $\lambda$ ) <sub>max</sub> (Å <sup>-1</sup> )                       | 0.658                   | 0.667                   | 0.720                   |
| No. of reflections                                                                          | 10314                   | 10824                   | 13408                   |
| No. of parameters                                                                           | 559                     | 559                     | 557                     |
| No. of restraints                                                                           | 21                      | 21                      | 4                       |

Table S2. Selected bond length for complexes 1-3.

| 1                    |           | 2                    |           | 3                    |           |
|----------------------|-----------|----------------------|-----------|----------------------|-----------|
| Bond                 | Length, Å | Bond                 | Length, Å | Bond                 | Length, Å |
| Gd1—O5               | 2.401 (3) | Tb1—O3               | 2.288 (4) | Dy1—O2 <sup>i</sup>  | 2.289 (2) |
| Gd1—O5 <sup>i</sup>  | 2.402 (3) | Tb1—O3 <sup>i</sup>  | 2.288 (4) | Dy1—O2               | 2.289 (2) |
| Gd1—O3               | 2.299 (4) | Tb1—O5               | 2.389 (4) | Dy1—O1               | 2.314 (2) |
| Gd1—O3 <sup>i</sup>  | 2.299 (4) | Tb1—O5 <sup>i</sup>  | 2.389 (4) | Dy1—O1 <sup>i</sup>  | 2.314 (2) |
| Gd1—O4 <sup>i</sup>  | 2.410 (4) | Tb1—O4               | 2.411 (4) | Dy1—N3               | 2.557 (3) |
| Gd1—O4               | 2.410 (4) | Tb1—O4 <sup>i</sup>  | 2.411 (4) | Dy1—N3 <sup>i</sup>  | 2.557 (3) |
| Gd1—N9               | 2.556 (4) | Tb1—N9 <sup>i</sup>  | 2.555 (4) | Dy1—N4               | 2.589 (3) |
| Gd1—N9 <sup>i</sup>  | 2.556 (4) | Tb1—N9               | 2.555 (4) | Dy1—N4 <sup>i</sup>  | 2.589 (3) |
| Gd2—O1 <sup>ii</sup> | 2.329 (3) | Tb2—O2 <sup>ii</sup> | 2.302 (4) | Dy2—O3               | 2.276 (3) |
| Gd2—O1               | 2.329 (3) | Tb2—O2               | 2.302 (4) | Dy2—O3 <sup>ii</sup> | 2.276 (3) |
| Gd2—O2               | 2.314 (3) | Tb2—O1 <sup>ii</sup> | 2.322 (4) | Dy2—O5 <sup>ii</sup> | 2.372 (2) |
| Gd2—O2 <sup>ii</sup> | 2.314 (3) | Tb2—O1               | 2.322 (4) | Dy2—O5               | 2.372 (2) |
| Gd2—N4 <sup>ii</sup> | 2.592 (4) | Tb2—N3 <sup>ii</sup> | 2.567 (4) | Dy2—O4               | 2.411 (2) |
| Gd2—N4               | 2.592 (4) | Tb2—N3               | 2.567 (4) | Dy2—O4 <sup>ii</sup> | 2.411 (2) |
| Gd2—N3 <sup>ii</sup> | 2.564 (4) | Tb2—N4               | 2.600 (4) | Dy2—N9 <sup>ii</sup> | 2.544 (3) |
| Gd2—N3               | 2.564 (4) | Tb2—N4 <sup>ii</sup> | 2.600 (4) | Dy2—N9               | 2.544 (3) |

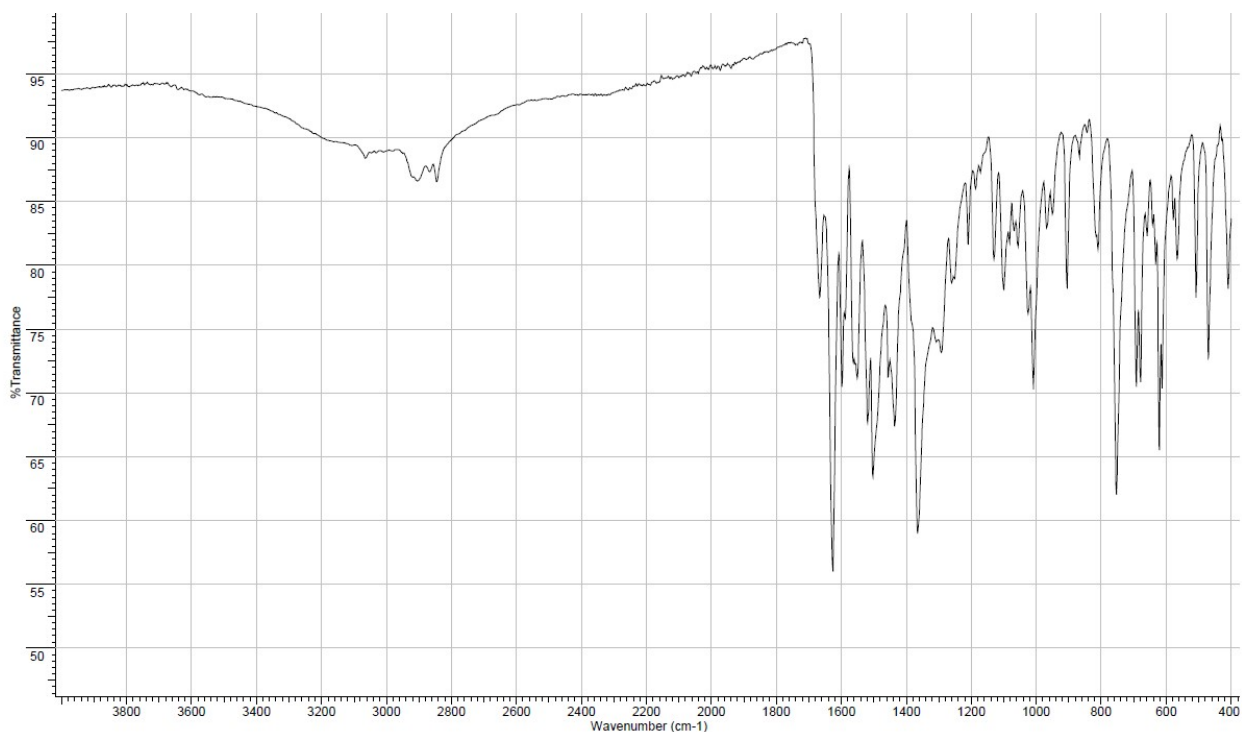

Figure S1. IR spectra of complex 1.

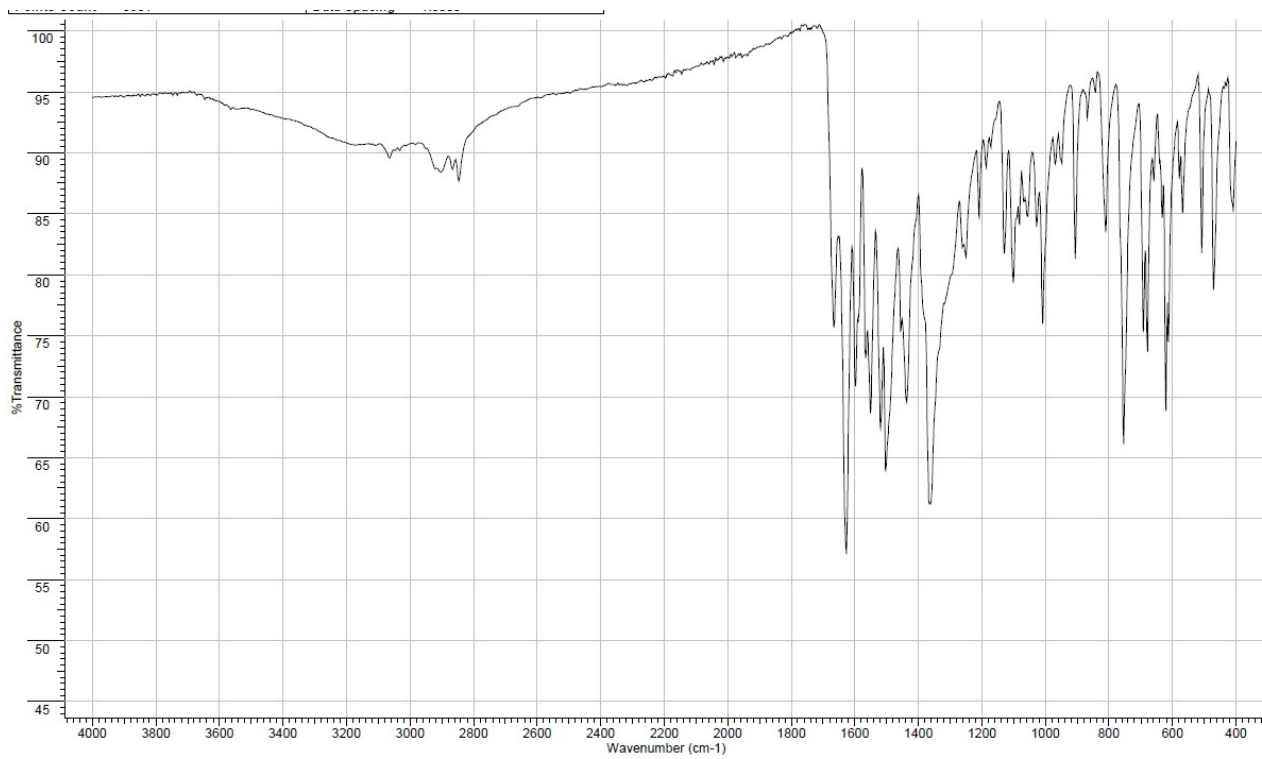

Figure S2. IR spectra of complex 2.

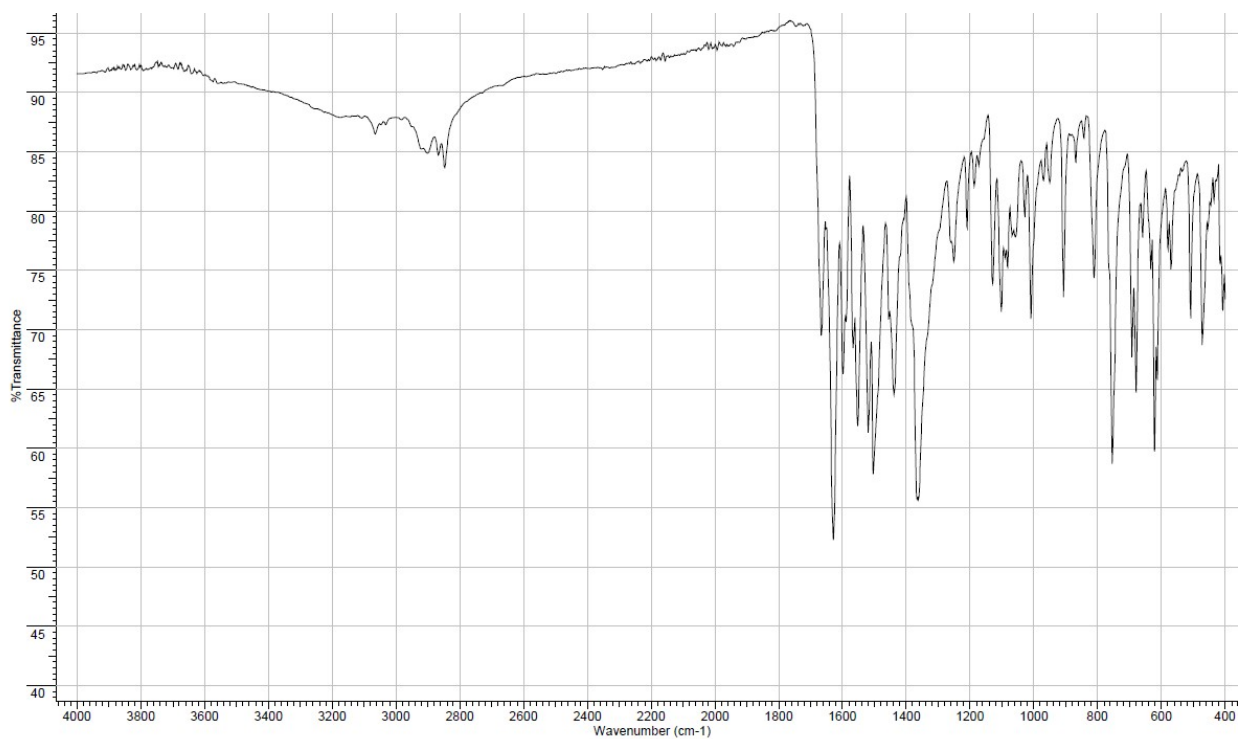

Figure S3. IR spectra of complex 3.

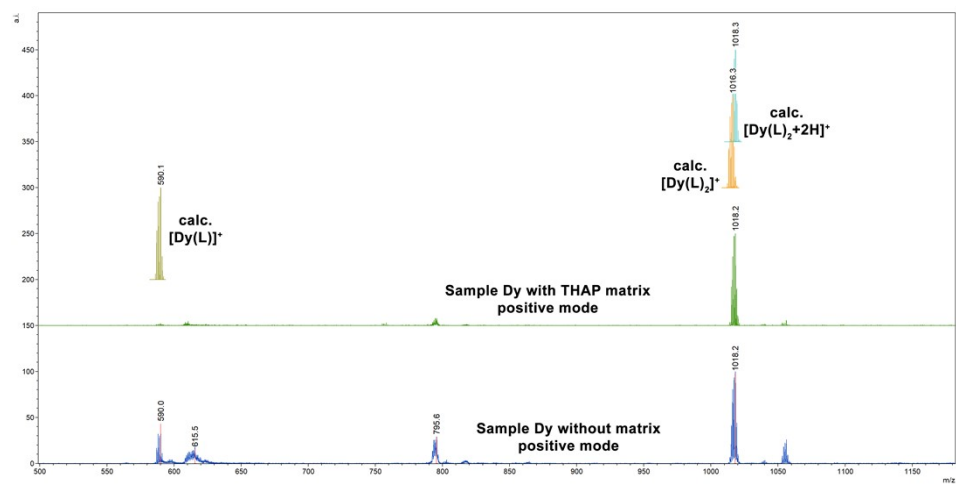

a)

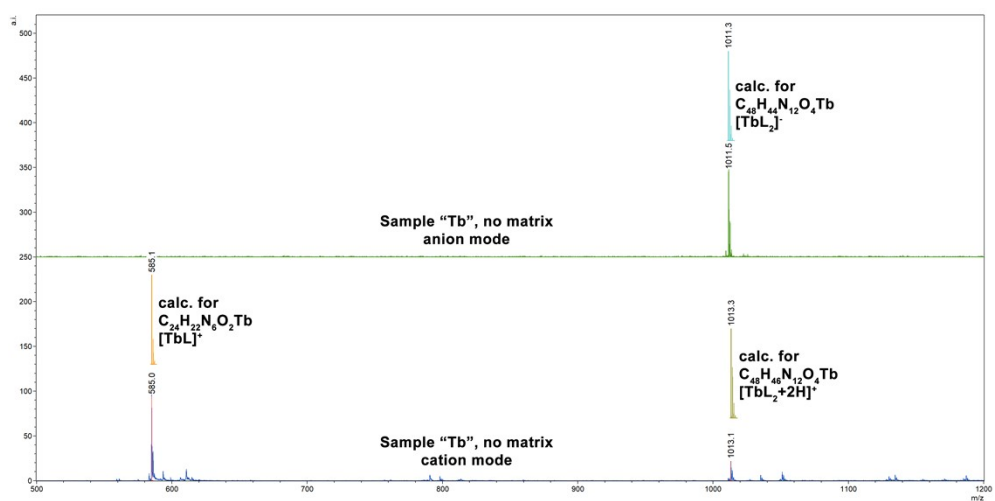

b)

Figure S4. a) ESI-MS spectra of complex 3; b) ESI-MS spectra of complex 2.

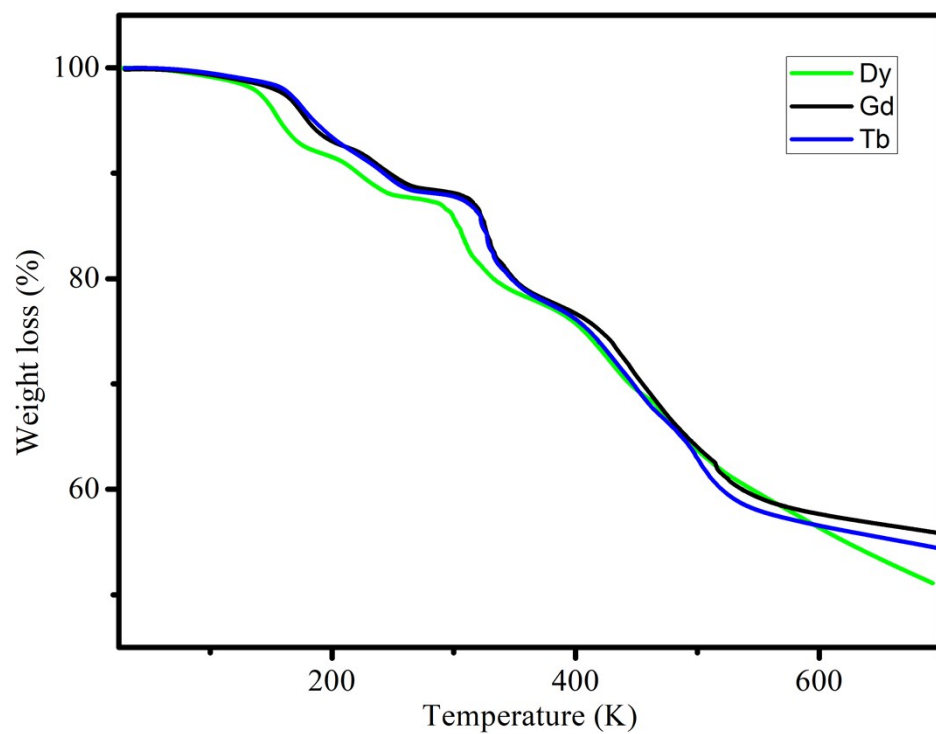

Figure S5. TG curves of complexes 1-3.

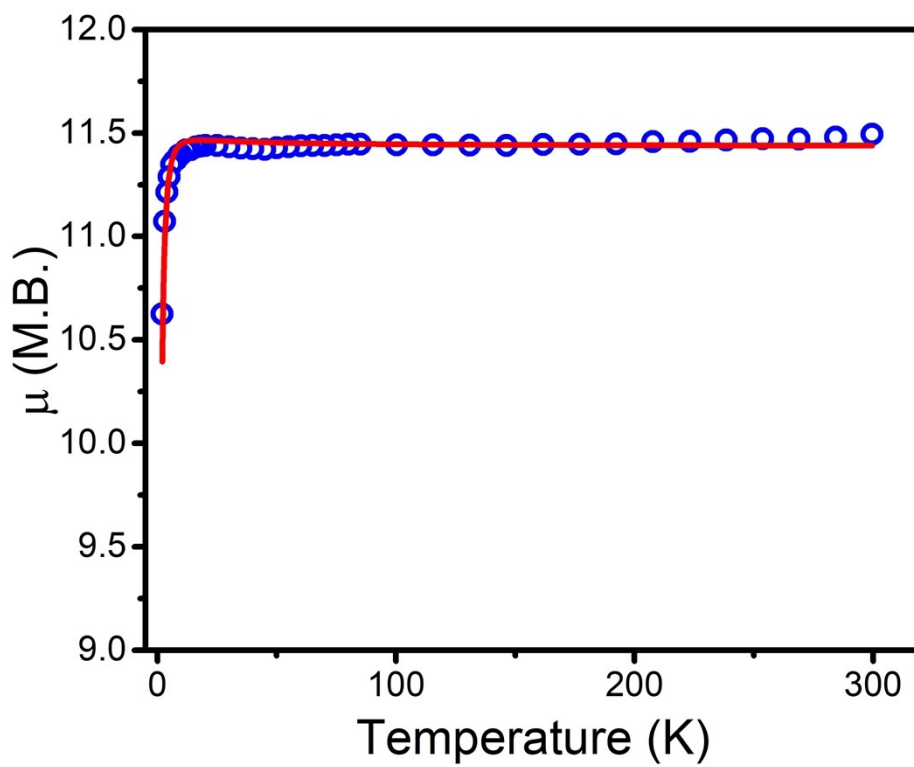

Figure S6. Temperature dependence of magnetic moment for 1. The red lines represent the best fit of the



theoretical model described in the main text.

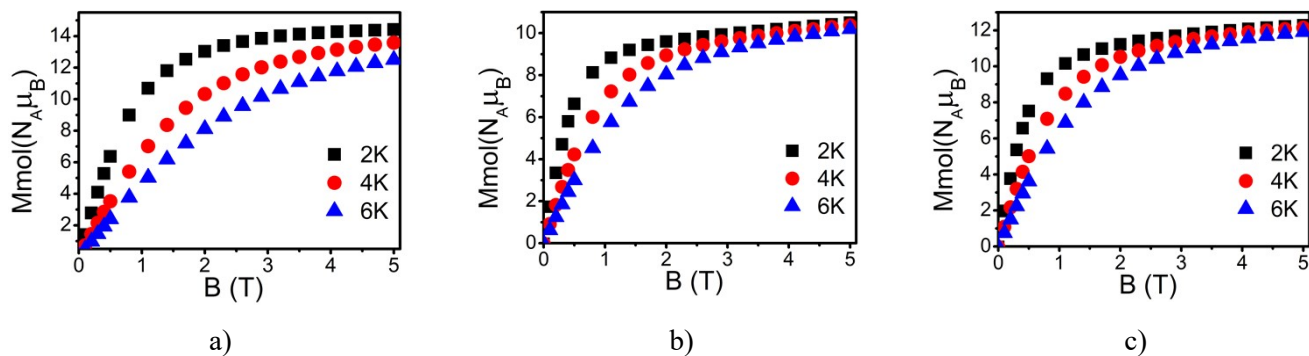

**Figure S7.** Field dependence of molar magnetization for **1** (a), **2** (b) and **3** (c) at different temperatures.

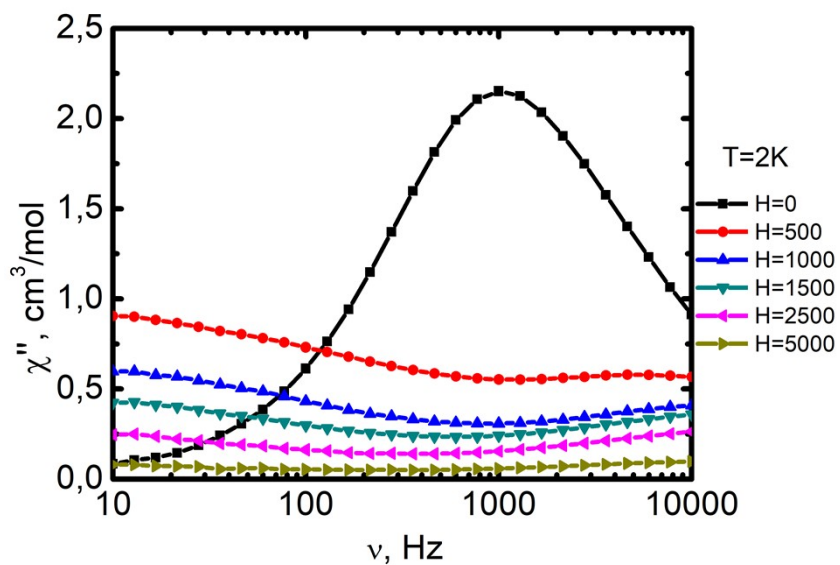

**Figure S8.** Field dependence of the out-of-phase signal vs frequency at 2 K for **3**

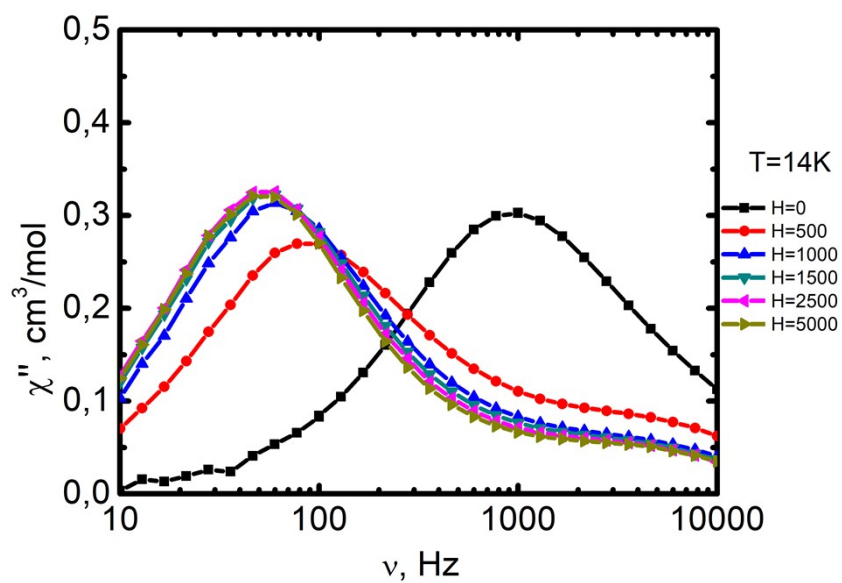

**Figure S9.** Field dependence of the out-of-phase signal vs frequency at 14 K for **3**

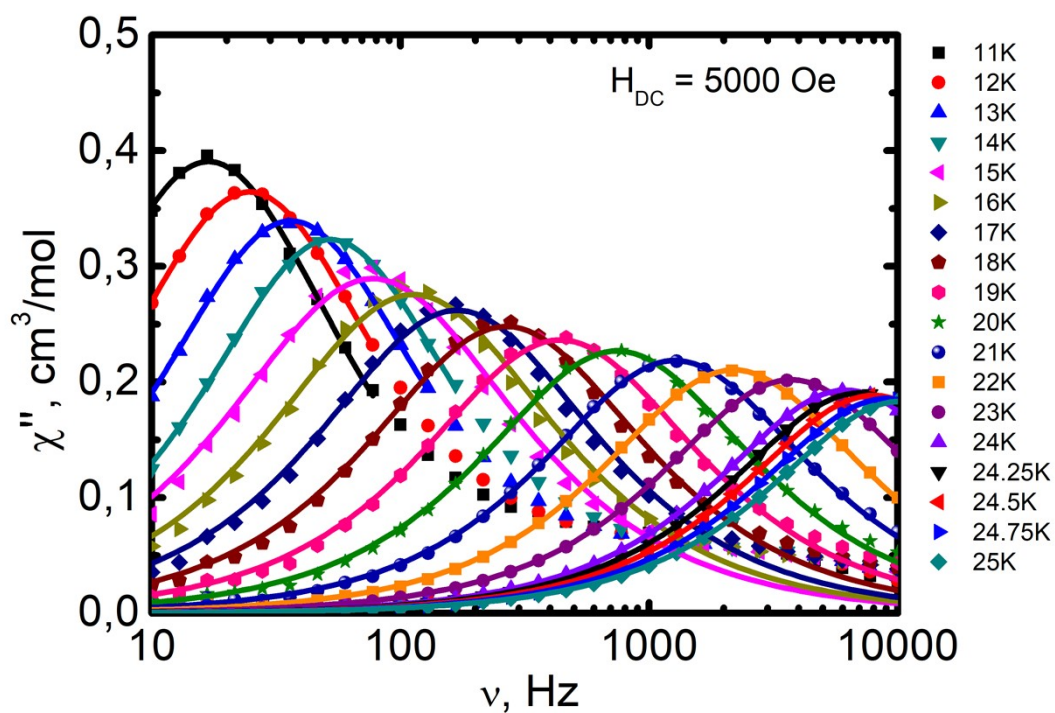

**Figure S10.** Frequency dependence of the out-phase  $\chi''$  ac susceptibility signals for **3** under 5000 Oe dc field

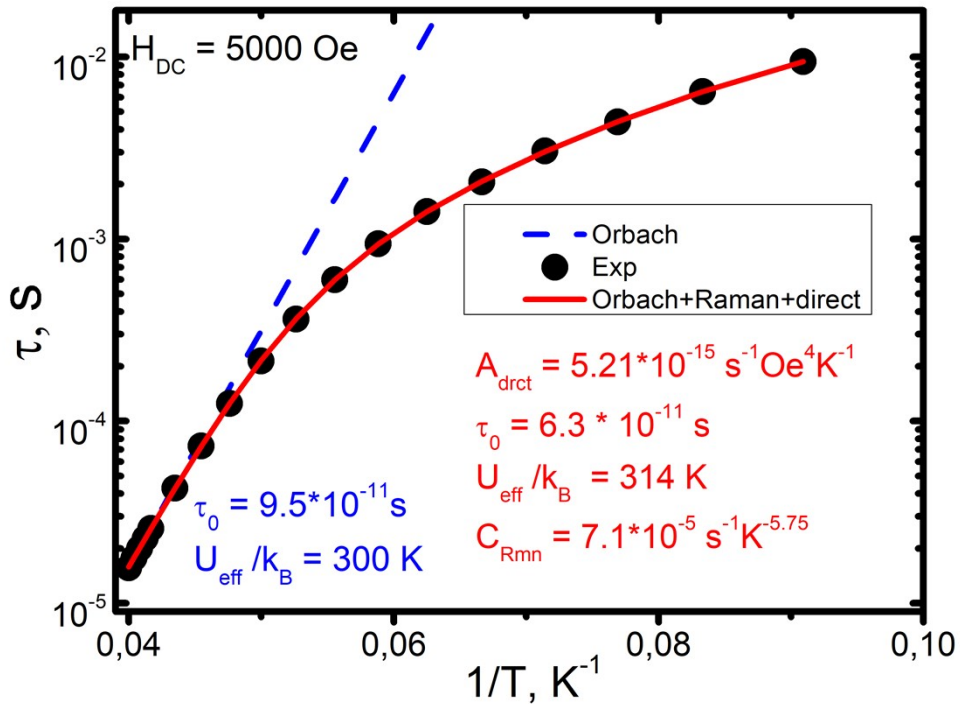

**Figure S11.** Relaxation data at 5000 Oe plotted as  $\tau$  vs.  $T^{-1}$  for **3**. The lines represent the best fits of experimental data to the Arrhenius equation and multiple relaxation processes

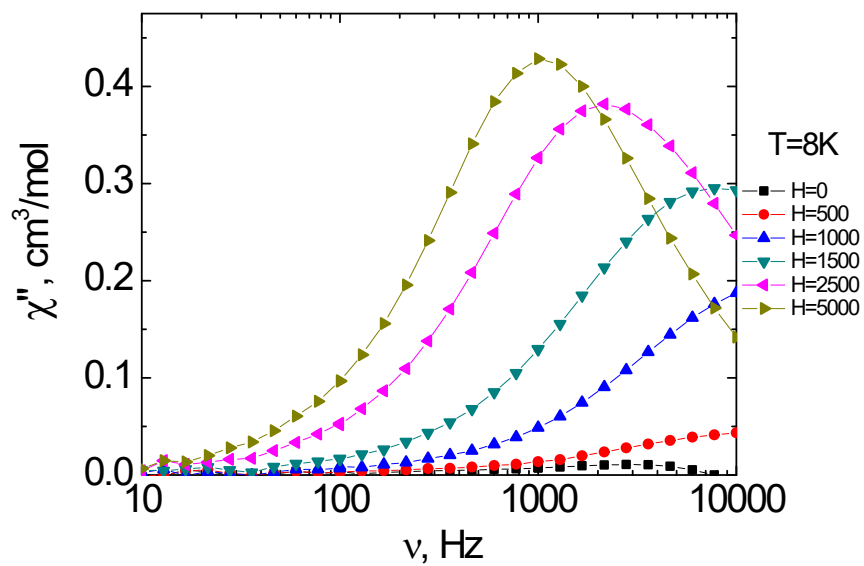

**Figure S12.** Field dependence of the out-of-phase signal vs frequency at 8 K for **2**

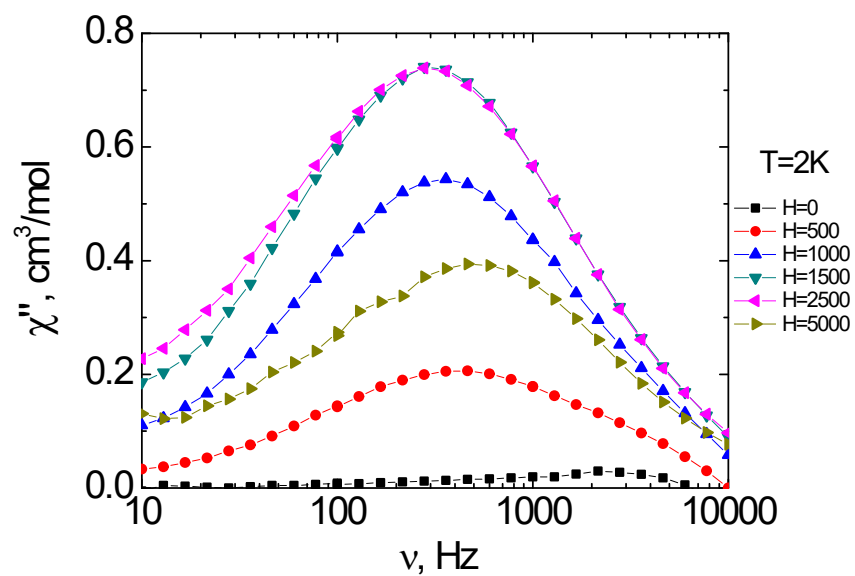

**Figure S13.** Field dependence of the out-of-phase signal vs frequency at 2 K for **1**

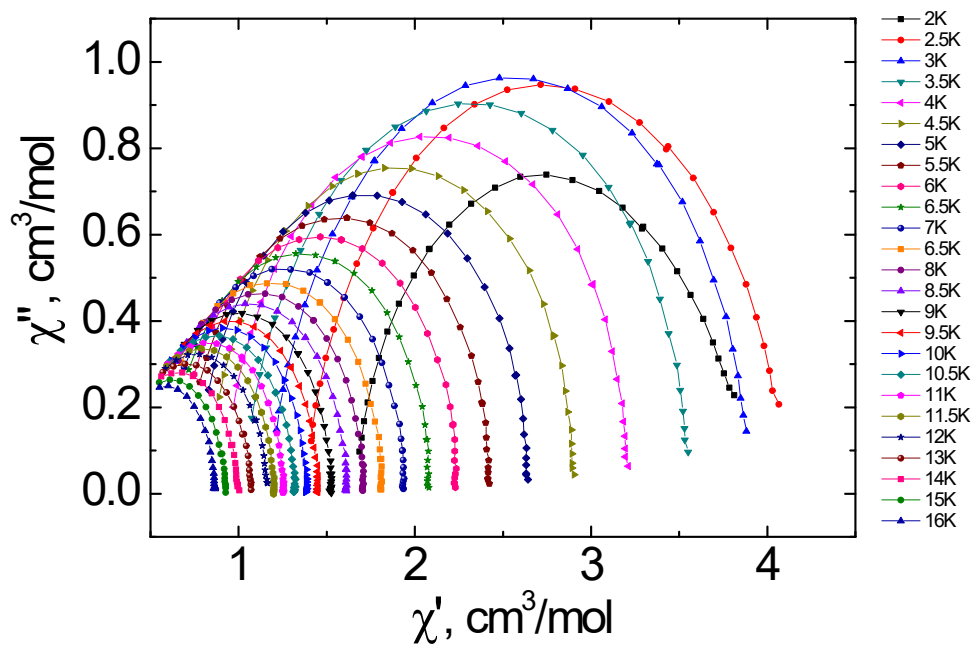

**Figure S14.** Cole-Cole dependence for **1** at different temperatures under 2500 Oe dc-field.

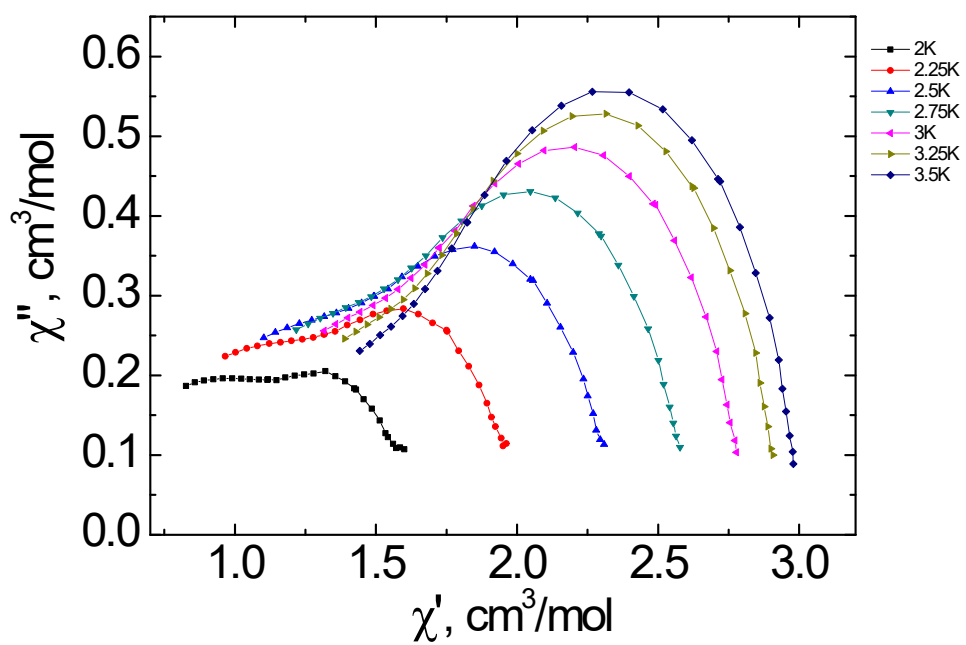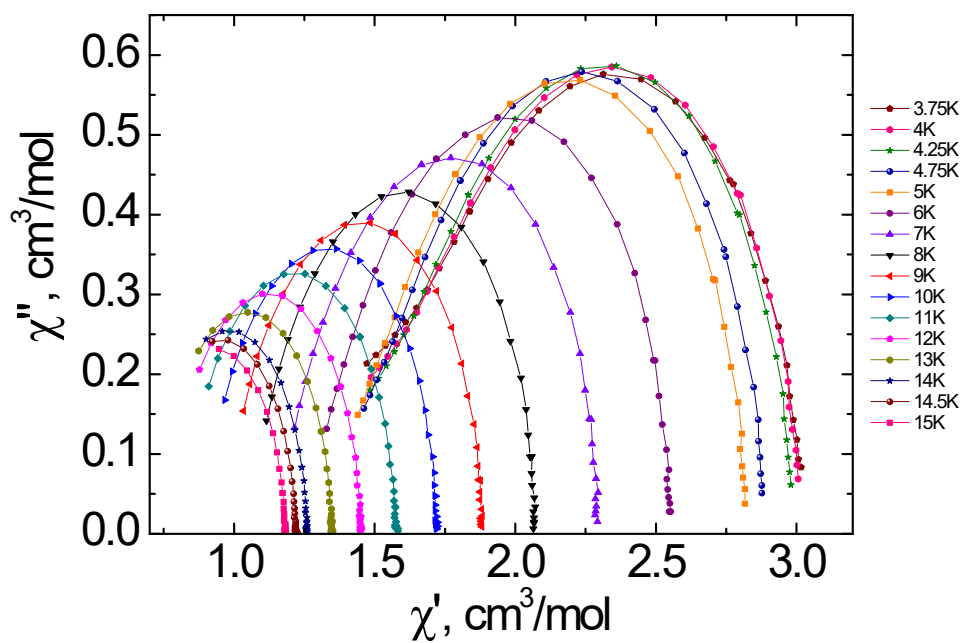

Figure S15. Cole-Cole dependence for **2** at different temperatures under 5000 Oe dc-field.

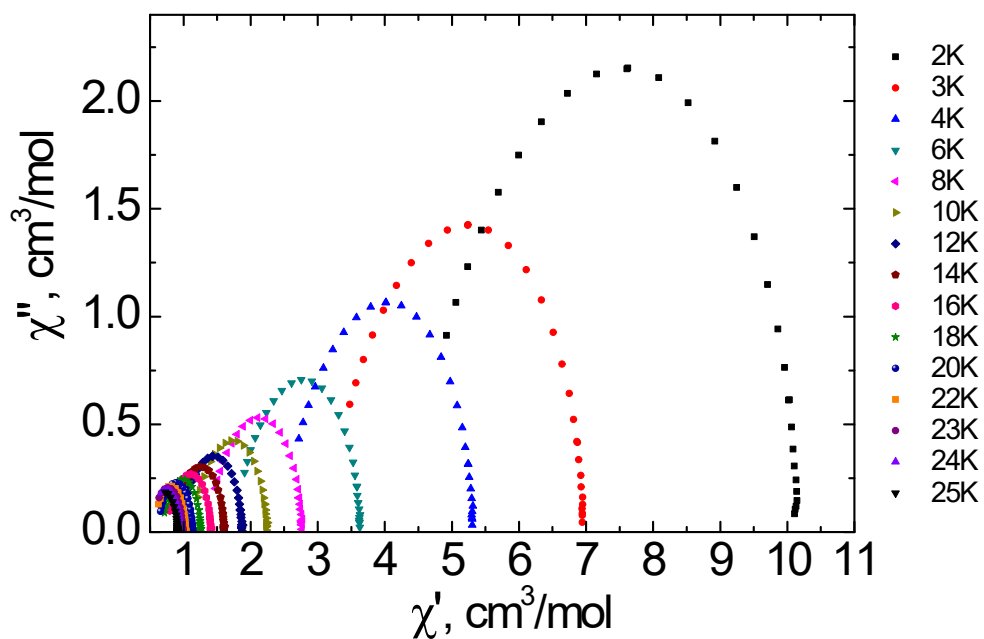

Figure S16. Cole-Cole dependence for 3 at different temperatures under zero dc-field.

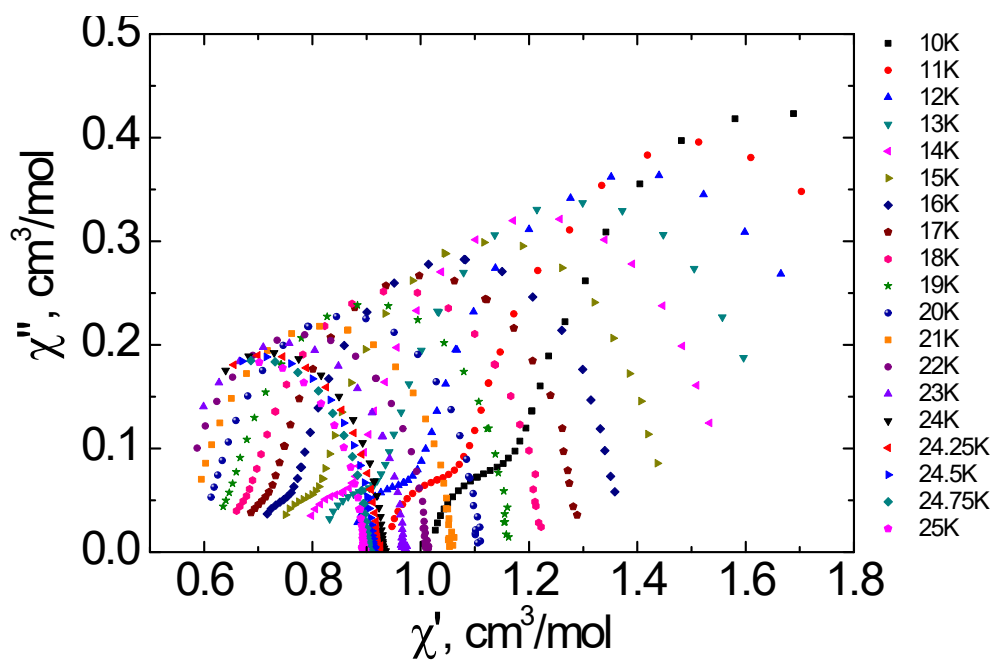

Figure S17. Cole-Cole dependence for 3 at different temperatures under 5000 Oe dc-field.

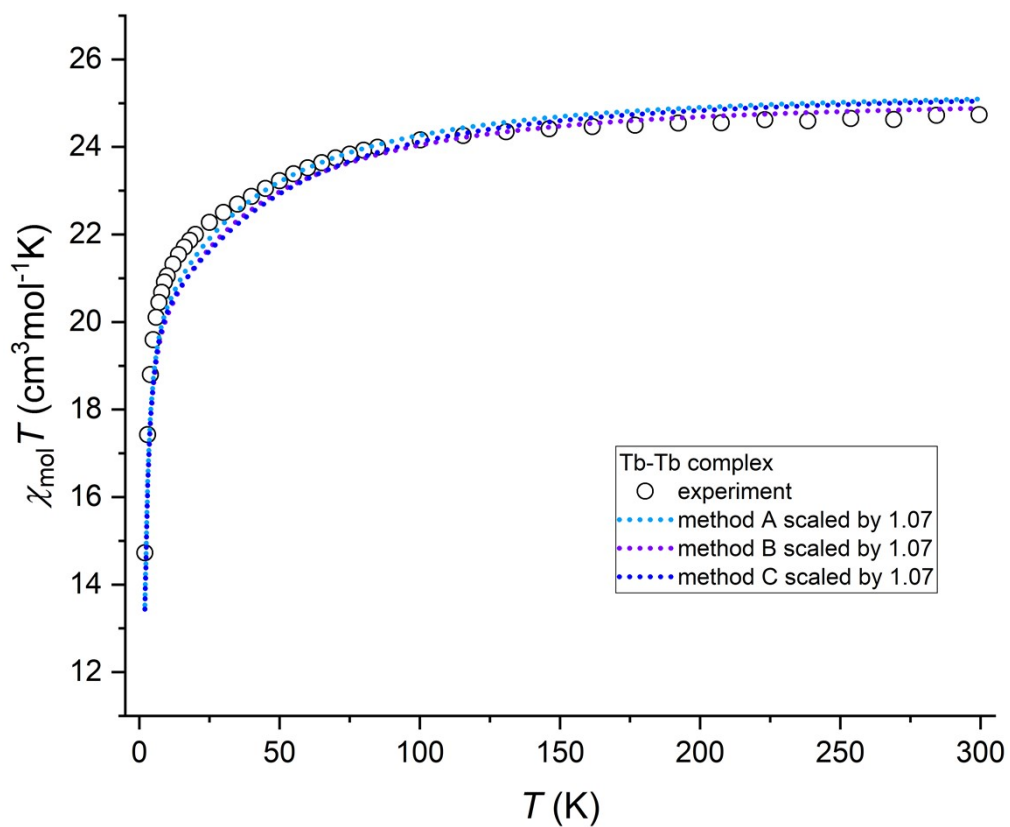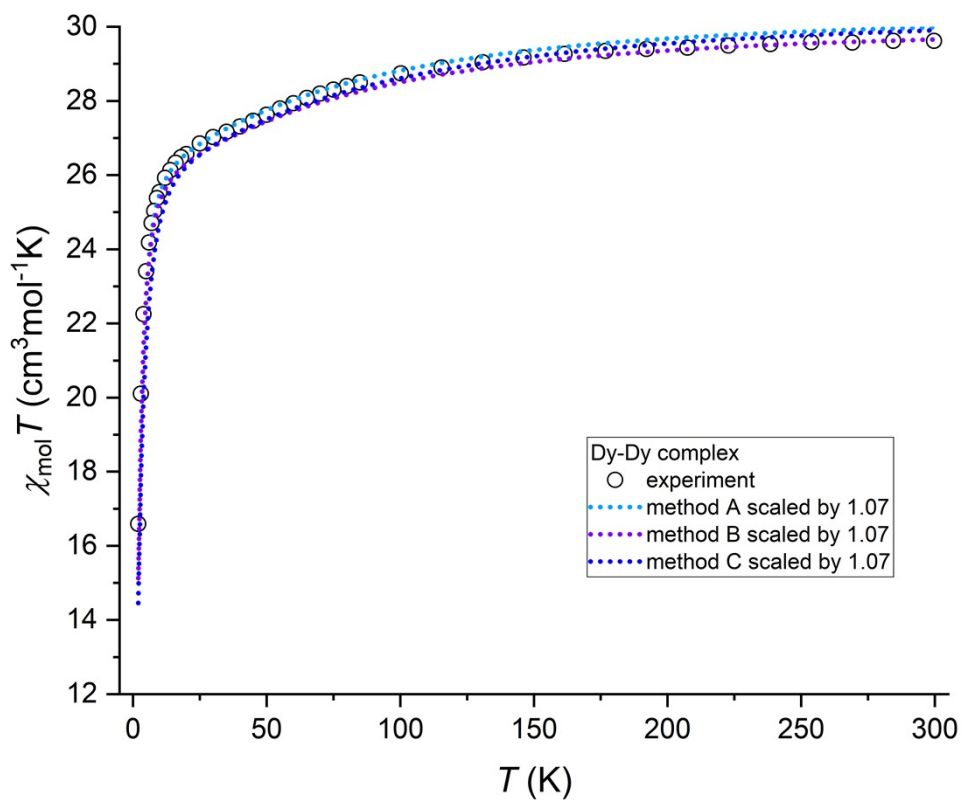

**Figure 18.** The comparison of the experimental magnetic data for **2** and **3**, and the calculated data from CASSCF/(NEVPT2/SINGLE\_ANISO calculations (method A-C).

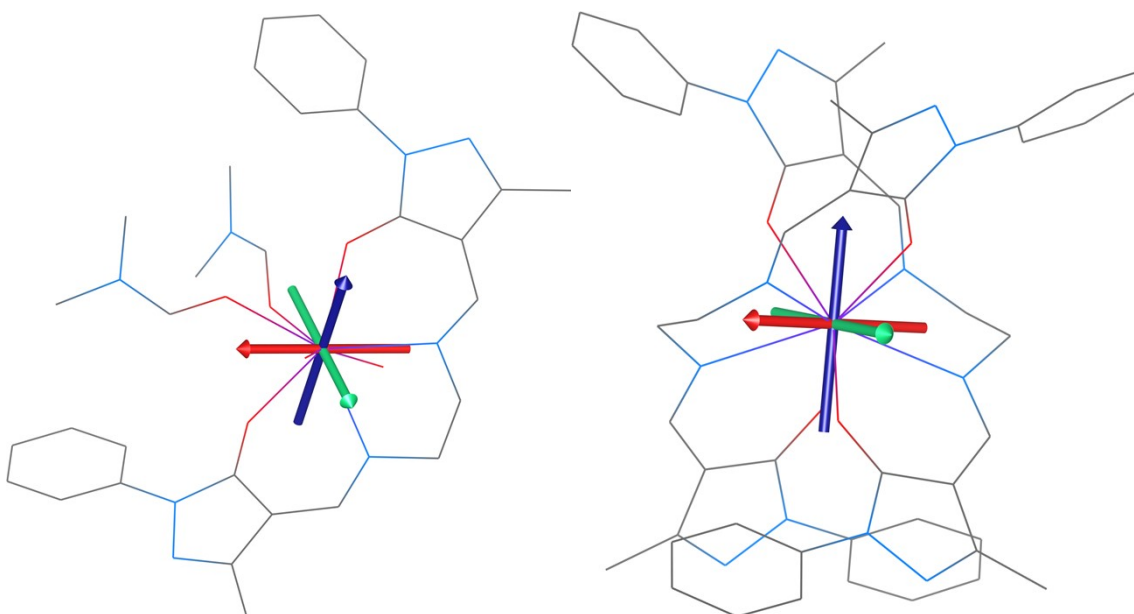

**Figure S19.** The molecular structures of complex cation (top) and anion (bottom) of compound **2** overlaid with principal axis of g-tensor of the first pseudo doublet (x/y/z-axes colored as red/green/blue arrows) resulting from CASSCF/SINGLE\_ANISO (method B).

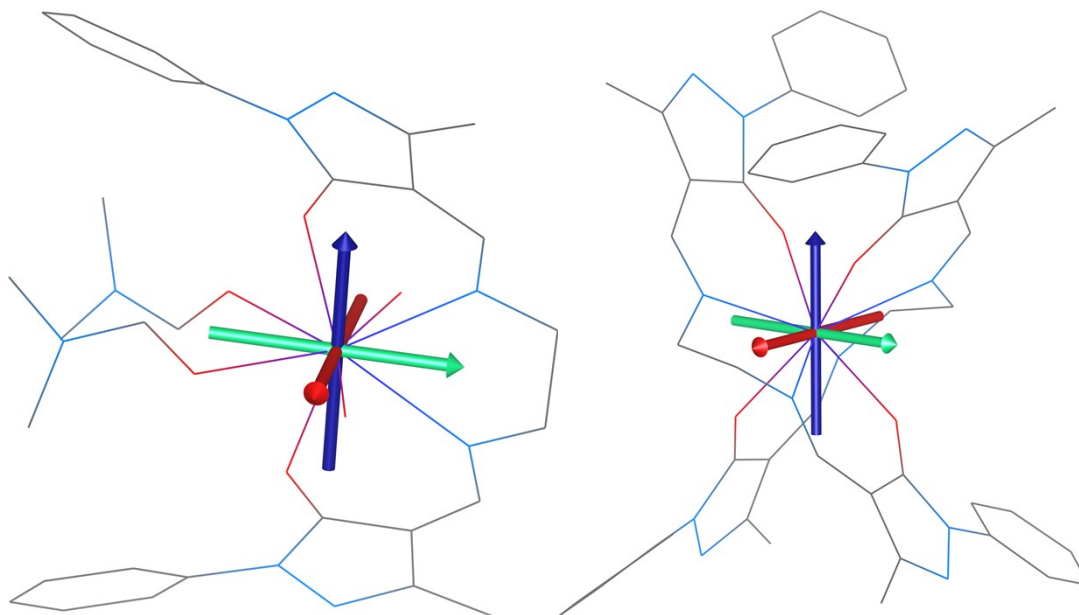

**Figure S20.** The molecular structures of complex cation and anion of compound **3** overlaid with principal axis of g-tensor of the first Kramers doublet (x/y/z-axes colored as red/green/blue arrows) resulting from CASSCF/SINGLE\_ANISO (method B).



**Table S3. The summarization of SMMs on Dy(III) ion and Salen-type ligand basis.**

| Complex                                                                                                                                 | $\Delta E/k_B$ (K)                  | Ref       |
|-----------------------------------------------------------------------------------------------------------------------------------------|-------------------------------------|-----------|
| $[\text{Dy}_4(\text{L1})_2(\text{HL}_1)_2\text{Cl}_2(\text{OH})_2]_2\text{Cl}_2(\text{OH})_2\cdot 3\text{EtOH}\cdot \text{H}_2\text{O}$ | 55.71                               | 1         |
| $[\text{Dy}_4(\text{L1})_6] \cdot 5.5\text{H}_2\text{O}$                                                                                | 17.2                                | 2         |
| $[\text{Dy}_4(\text{L2})_4(\mu_3\text{-O})_2(\text{NO}_3)_2]$                                                                           | 68.59                               | 3         |
| $[\text{Ln}(\text{H}_2\text{L3})(\text{NO}_3)_3]$                                                                                       | 44.6                                | 4         |
| $\{\text{Dy}(\text{H}_2\text{L4}) 1.5(\text{NO}_3)_3\} \cdot 5\text{CHCl}_3 \cdot \text{CH}_3\text{OH}$                                 | 20.24                               | 5         |
| $(\text{Et}_3\text{NH})[\text{Dy}((\text{R,R})/(\text{S,S})\text{-L5})_2]$                                                              | 39.9                                | 6         |
| $[\text{Dy}(\text{L6})(\text{NO}_3)(\text{CH}_3\text{OH})_2]$                                                                           | 157.78                              | 7         |
| $(\text{Et}_3\text{NH})[\text{Dy}(\text{L7})_2]$                                                                                        | 39.7                                | 8         |
| $[\text{Dy}_4(\text{L2})_2(\text{HL8})_2(\text{NO}_3)_2(\text{OH})_2](\text{NO}_3)_2 \cdot 4\text{H}_2\text{O}$                         | 48.1                                | 9         |
| $[\text{Dy}(\text{H}_2\text{L8})_{1.5}\text{Cl}_3]_n$                                                                                   | 24.4 K                              | 10        |
| $[\text{Dy}_2(\text{H}_2\text{L8})_2(\text{NO}_3)_4(\text{CH}_3\text{O})_2]_n$                                                          | 50.9                                | 11        |
| $[\text{Dy}_4(\text{HL6})_4(\text{OAc})_2(\text{H}_2\text{O})_2] \cdot 2\text{Et}_3\text{NH} \cdot 2\text{CH}_3\text{CN}$               | 207(2)<br>343                       | 12        |
| $[\text{Dy}(\text{H}_2\text{O})_2(\text{DMF})_2\text{L}][\text{DyL}_2]$                                                                 | 243 (H = 0 Oe)<br>314 (H = 5000 Oe) | This work |

*H<sub>2</sub>L1* - *N,N'*-bis(salicylidene)-1,2-ethylenediamine

*H<sub>2</sub>L2* - *N,N'*-bis(3-methoxysalicylidene)cyclohexane-1,2-diamine

*H<sub>2</sub>L3* - *N,N'*-bis(3-methoxysalicylidene)-2,2-dimethylbutanediamine-1,3

*H<sub>2</sub>L4* - *N,N'*-bis(salicylidene)-1,2-cyclohexanediamine

*H<sub>2</sub>L5* - *N,N'*-(1,2-cyclohexanediylethylene)bis(3-nitrosalicylideneiminato)

*H<sub>2</sub>L6* - *N,N'*-bis(5-nitrosalicylaldehyde)ethane-1,2-cyclohexanediamine

*H<sub>2</sub>L7* - *N,N'*-bis(3-nitro-salicylaldehyde)ethylenediamine

*H<sub>2</sub>L8* - *N,N'*-bis(salicylidene)-1,4-butanediamine

(1) F. Luan, T. Liu, P. Yan, X. Zou, Y. Li, and G. Li, *Inorg. Chem.* 2015, 54, 7, 3485–3490;

(2) B. H. Koo, K. S. Lim, D. W. Ryu, W. R. Lee, E. K. Koh, C. S. Hong, *Dalton Trans.*, 2013, 42, 7204-7209;

(3) Z.-H. Zhu, H.-F. Wang, S. Yu, H.-H. Zou, H.-L. Wang, B. Yin, F.-P. Liang, *Inorg. Chem.* 2020, 59, 16, 11640–11650;

(4) L. Hua, F.-W. Zheng, H.-T. Chen, L. Wang, D.-J. Li, L. Yang, F.-J. Han, X.-Y. Duan, T.-T. Liu, W.-X. Wang, *Journal of Solid State Chemistry* 2021, 303, 122463;

(5) X. Zou, C. Du, Y. Dong, G. Li, *Inorganica Chimica Acta* 2020, 507, 119455;

(6) M. Ren, Z.-L. Xu, T.-T. Wang, S.-S. Bao, Z.-H. Zheng, Z.-C. Zhang, L.-M. Zheng, *Dalton Trans.*, 2016, 45, 690-695;

(7) L. Wang, X. Yao, X. Zou, J. Li, W. Sun, G. Li, *CrystEngComm*, 2022, 24, 1907-1916;

(8) M. Ren, Z.-L. Xu, S.-S. Bao, T.-T. Wang, Z.-H. Zheng, R. A. S. Ferreira, L.-M. Zheng, L. D. Carlos, *Dalton Trans.*, 2016, 45, 2974-2982; (9) F. Luan, P. Yan, J. Zhu, T. Liu, X. Zou, G. Li, *Dalton Trans.*, 2015, 44, 4046-4053;

(10) Y. Yue, G. Hou, X. Yao, G. Li, *Polyhedron*, 2017, 129, 157-163;

(11) Y. Yue, P. Yan, J. Sun, G. Li, *Inorganic Chemistry Communications*, 2015, 54, 5–8

**Table S4. The summarization of SMMs on Dy(III) ion and Schiff base ligand basis with  $\Delta E/k_B > 200$  K**

| Complex                                                                                                                          | $\Delta E/k_B$ (K)                        | Ref       |
|----------------------------------------------------------------------------------------------------------------------------------|-------------------------------------------|-----------|
| [Dy(L1) <sub>2</sub> (THF) <sub>2</sub> ][B(C <sub>6</sub> H <sub>5</sub> ) <sub>4</sub> ]                                       | 378 (H = 0 Oe)                            | 1         |
| [Dy(L2) <sub>2</sub> (Py) <sub>2</sub> ][B(C <sub>6</sub> H <sub>5</sub> ) <sub>4</sub> ]                                        | 388 (H = 0 Oe)                            | 1         |
| Dy(HL3) <sub>3</sub>                                                                                                             | 270 (H = 1000 Oe)<br>Magnetically diluted | 2         |
| [Dy <sub>4</sub> (L4) <sub>2</sub> (HL4) <sub>2</sub> (N <sub>3</sub> ) <sub>4</sub> (O)]·14H <sub>2</sub> O                     | 270 (H = 1600 Oe)                         | 3         |
| {Dy <sub>2</sub> (L5) <sub>2</sub> (Phen) <sub>2</sub> (diphenylphosphate) <sub>2</sub> (MeOH) <sub>2</sub> }                    | 232.9 (H = 0 Oe)                          | 4         |
| [Dy <sub>4</sub> (HL6) <sub>4</sub> (OAc) <sub>2</sub> (H <sub>2</sub> O) <sub>2</sub> ]·2Et <sub>3</sub> NH·2CH <sub>3</sub> CN | 207 and 343<br>(H = 0 Oe)                 | 5         |
| [Dy(L7) <sub>2</sub> (py) <sub>2</sub> ][B(Ph) <sub>4</sub> ]·py                                                                 | 679 (H = 0 Oe)                            | 6         |
| [Dy(H <sub>2</sub> O) <sub>2</sub> (DMF) <sub>2</sub> L][DyL <sub>2</sub> ]                                                      | 243 (H = 0 Oe)<br>314 (H = 5000 Oe)       | This work |

L1 - 2,4-di-tert-butyl-6-((quinolin-8-ylimino)methyl)phenolate

L2 - 2,4-di-tert-butyl-6-((pyridin-2-ylmethyl)imino)methyl)phenolate

H<sub>2</sub>L3 - 2-hydroxy-N'-[(E)-(2-hydroxy-3-methoxyphenyl)methylidene]benzhydrazide

H<sub>2</sub>L4 - 1,3-bis[1-(2-pyridyl)ethylideneamino]urea

H<sub>2</sub>L5 - 2-(((2-hydroxyphenyl)imino)methyl)-6-methoxyphenol

H<sub>2</sub>L6 - N,N'-bis(3-hydroxylsalicylidene)benzene-1,2-diamine

L7 - 2,4-bis(1,1-dimethylethyl)-6-[[2-methoxy-5-methylphenyl]imino]methyl] phenolate

- (1) J. Long, I. Basalov, N. Forosenko, K. A. Lyssenko, E. Mamontova, et al.. Chemistry-A European Journal, 2019, 25 (2), 474-478.doi10.1002/chem.201804429;
- (2) Eva Lucaccini, Matteo Briganti, Mauro Perfetti, Laure Vendier, Jean-Pierre Costes, Federico Totti, Roberta Sessoli, and L. Sorace. Chem. Eur. J. 2016, 22, 5552 – 5562
- (3) M. U. Anwar, L. K. Thompson, L. N. Dawe, F. Habib, M. Murugesu Chem. Commun., 2012, 48, 4576–4578
- (4) S. P. Bera, A. Mondal, S. Konar, Inorg. Chem. Front., 2020, 7, 3352-3363
- (5) T.-T. Wang, Z.-W. Che, J.-T. Chen, H. Yan, T.-D. Zhou, Y.-Q. Zhang, W.-B. Sun. Inorg. Chem. Front., 2023, 10, 1501–1510
- (6) J. Long, I. V. Basalov, K. A. Lyssenko, A. V. Cherkasov, E. Mamontova, Y. Guari, J. Larionova, A. A. Trifonov. Chem. Asian J., 2020, 15, 2706-2715

**Table S5.** The splitting of the lowest multiplets for Tb-cationic complex of **2** calculated by CASSCF/SINGLE\_ANISO (method B) together with g-values for selected pseudo doublets and respective tunnelling rates

| $E$ (cm <sup>-1</sup> ) |                                                                                       |
|-------------------------|---------------------------------------------------------------------------------------|
| 0                       | $g_x = 0.000, g_y = 0.000, g_z = 16.540, \Delta_{\text{tun}} = 0.784 \text{ cm}^{-1}$ |
| 0.8                     |                                                                                       |
| 61.5                    | $g_x = 0.000, g_y = 0.000, g_z = 12.597, \Delta_{\text{tun}} = 2.261 \text{ cm}^{-1}$ |
| 63.8                    |                                                                                       |
| 67.3                    | $g_x = 0.000, g_y = 0.000, g_z = 15.852, \Delta_{\text{tun}} = 0.863 \text{ cm}^{-1}$ |
| 68.2                    |                                                                                       |
| 124                     |                                                                                       |
| 145                     |                                                                                       |
| 185                     |                                                                                       |
| 308                     |                                                                                       |
| 316                     |                                                                                       |
| 635                     |                                                                                       |
| 636                     |                                                                                       |

**Table S6.** The splitting of the lowest multiplets for Tb-anionic complex of **2** calculated by CASSCF/SINGLE\_ANISO (method B) together with g-values for selected pseudo doublets and respective tunnelling rates

| $E$ (cm <sup>-1</sup> ) |                                                                                       |
|-------------------------|---------------------------------------------------------------------------------------|
| 0                       | $g_x = 0.000, g_y = 0.000, g_z = 17.783, \Delta_{\text{tun}} = 0.007 \text{ cm}^{-1}$ |
| 0                       |                                                                                       |
| 161                     | $g_x = 0.000, g_y = 0.000, g_z = 17.792, \Delta_{\text{tun}} = 0.154 \text{ cm}^{-1}$ |
| 161                     |                                                                                       |
| 174                     | $g_x = 0.000, g_y = 0.000, g_z = 14.319, \Delta_{\text{tun}} = 0.832 \text{ cm}^{-1}$ |
| 175                     |                                                                                       |
| 285                     |                                                                                       |
| 292                     |                                                                                       |
| 309                     |                                                                                       |
| 323                     |                                                                                       |
| 346                     |                                                                                       |
| 439                     |                                                                                       |
| 442                     |                                                                                       |

**Table S7.** The splitting of the lowest multiplets for Dy-cationic complex of **3** calculated by CASSCF/SINGLE\_ANISO (method B) together with g-values for each Kramers doublets

| $E$ (cm <sup>-1</sup> ) | $g_x$ | $g_y$ | $g_z$  |
|-------------------------|-------|-------|--------|
| 0                       | 0.003 | 0.004 | 19.617 |
| 201                     | 0.201 | 0.352 | 16.355 |
| 324                     | 3.055 | 4.921 | 13.821 |
| 387                     | 7.052 | 5.262 | 0.349  |
| 481                     | 3.086 | 3.560 | 10.706 |
| 552                     | 0.213 | 0.397 | 15.531 |
| 639                     | 0.004 | 0.051 | 19.216 |
| 706                     | 0.001 | 0.009 | 19.778 |

**Table S8.** The splitting of the lowest multiplets for Dy-anionic complex of **3** calculated by CASSCF/SINGLE ANISO (method B) together with g-values for each Kramers doublets

| $E$ (cm <sup>-1</sup> ) | $g_x$  | $g_y$ | $g_z$  |
|-------------------------|--------|-------|--------|
| 0                       | 0.617  | 5.253 | 13.584 |
| 5.8                     | 0.693  | 4.568 | 13.453 |
| 118                     | 2.569  | 4.354 | 14.826 |
| 161                     | 8.672  | 6.374 | 0.402  |
| 255                     | 8.474  | 7.589 | 0.210  |
| 325                     | 8.887  | 6.768 | 2.792  |
| 346                     | 2.342  | 3.394 | 7.652  |
| 378                     | 11.996 | 7.872 | 0.690  |
